# Supplementary material for: The interactive effects of temperature and food consumption on growth of larval Arctic cod (Boreogadus saida)
Source: Oxford University Press journal article supplement (doi:10.1525/elementa.2021.00045), 2021-01-01
Supplement: supplemental_material.docx [file supplemental_material.docx]

Supplemental material to article:

**The interactive effects of temperature and food consumption on growth of Arctic cod (*Boreogadus saida*): a bioenergetic model**

Carmen L. David1,2, Rubao Ji2, Caroline Bouchard3,4, Haakon Hop5 and Jeffrey A. Hutchings1,6,7

1Department of Biology, Dalhousie University, Halifax, NS B3H 4R2, Canada

2 Department of Biology, Woods Hole Oceanographic Institution, MA 02543, USA

3Greenland Climate Research Centre, Greenland Institute of Natural Resources, 3900 Nuuk, Greenland

4 Département de Biologie, Université Laval, Québec, QC, G1V 0A6, Canada

5 Norwegian Polar Institute, Fram Centre, 9296 Tromsø, Norway

6 Institute of Marine Research, Nye Flødevigen 20, 4817 His, Norway

7 Centre for Coastal Research, University of Agder, 4630 Kristiansand, Norway

for submission to journal *Elementa: Science of the Anthropocene*

**List of the supplemental figures, text and tables:**

Figure S1. Sea surface temperature (SST) in Baffin Bay

Figure S2. Sea surface temperature (SST) in Beaufort Sea

Figure S3. Sea surface temperature (SST) in Kitikmeot region

Figure S4. Sea surface temperature (SST) in Laptev Sea

Text S1. Fitting parameter *P* and model validation

Figure S5. Fitting parameter *P* and model validation: Baffin Bay 2006

Figure S6. Fitting parameter *P* and model validation: Baffin Bay 2008

Figure S7. Fitting parameter *P* and model validation: Beaufort Sea 2010

Figure S8. Fitting parameter *P* and model validation: Beaufort Sea 2011

Figure S9. Fitting parameter *P* and model validation: Beaufort Sea 2014

Figure S10. Fitting parameter *P* and model validation: Kitikmeot 2006

Figure S11. Fitting parameter *P* and model validation: Kitikmeot 2011

Figure S12. Fitting parameter *P* and model validation: Kitikmeot 2015

Figure S13. Fitting parameter *P* and model validation: Laptev Sea 2003

Figure S14. Fitting parameter *P* and model validation: Laptev Sea 2007

Table S1. Model efficiency in predicting length-at-age in 2005 for different larval sizes at hatch

Text S2. Sensitivity of growth to individual model parameters

Table S2. Variation in model parameters and contribution to prediction error (R2) shown by two larval sizes

Figure S15. Sensitivity analysis by individual parameter perturbation (IPP)

Text S3. Sensitivity of growth to the combined effect of model parameters

Figure S16. Pearson correlation between modeled larval length (small larvae of 6 mm) and model parameters

Figure S17. Pearson correlation between modeled larval length (large larvae of 12 mm) and model parameters

Figure S18. Parameters ranking from a global sensitivity analysis

**Figure S1. Sea surface temperature (SST) in Baffin Bay**.

Daily SST fields were downloaded from the ECCO2 product (Menemelis et al., 2008) in each year, covering the estimated months of hatching and larval growth (from April 14 until September 15). Maps show average values.

**Figure S2. Sea surface temperature (SST) in Beaufort Sea.**

Daily SST fields were downloaded from the ECCO2 product (Menemelis et al., 2008) in each year, covering the estimated months of hatching and larval growth (from April 14 until September 15). Maps show average values.

**Figure S3.** **Sea surface temperature (SST) in Kitikmeot region**.

Daily SST fields were downloaded from the ECCO2 product (Menemelis et al., 2008) in each year, covering the estimated months of hatching and larval growth (from April 14 until September 15). Maps show average values.

**Figure S4.** **Sea surface temperature (SST) in Laptev Sea**.

Daily SST fields were downloaded from the ECCO2 product (Menemelis et al., 2008) in each year, covering the estimated months of hatching and larval growth (from April 14 until September 15). Maps show average values.

**Text S1. Fitting parameter *P* and model validation**

The following Figures S5–S14 illustrate bioenergetic model (BEM) predictions using the best value of *P* parameter and model validation per individual region-years (see figure titles), as presented in Table 1. For all the plots, the black dots are length-at-age observation values used for fitting parameter *P*, and red squares are observation values used for model validation and estimation of EF (model efficiency, after Mayer and Butler, 1993). Each individual region-year dataset was randomly split into two parts, 60% and 40% for fitting and validation, respectively. Black line is the linear regression of observation values used for fitting, and red line indicate the predicted values estimated with BEM, using an average temperature for the respective region-year and initial length-at-age the smallest values in the observations dataset) calculated with the best *P* found for that region-year.

**Figure S5. Fitting parameter *P* and model validation: Baffin Bay 2006.**

**Figure S6. Fitting parameter *P* and model validation: Baffin Bay 2008.**

**Figure S7. Fitting parameter *P* and model validation: Beaufort Sea 2010.**

**Figure S8. Fitting parameter *P* and model validation: Beaufort Sea 2011.**

**Figure S9. Fitting parameter *P* and model validation: Beaufort Sea 2014.**

**Figure S10. Fitting parameter *P* and model validation: Kitikmeot 2006.**

**Figure S11. Fitting parameter *P* and model validation: Kitikmeot 2011.**

**Figure S12. Fitting parameter *P* and model validation: Kitikmeot 2015.**

**Figure S13. Fitting parameter *P* and model validation: Laptev Sea 2003.**

**Figure S14. Fitting parameter *P* and model validation: Laptev Sea 2007.**

**Table S1. Model efficiency in predicting length-at-age in 2005 for different larval sizes at hatcha**

| **Region** | **N** | ***P*** | **L_ini** | **EF** |
| --- | --- | --- | --- | --- |
| Baffin Bay | 71 | 0.85 | 4 | 0.791 |
| Baffin Bay | 71 | 0.85 | 5 | 0.738 |
| Baffin Bay | 71 | 0.85 | 6 | 0.555 |
| Baffin Bay | 71 | 0.85 | 7 | 0.243 |
| Beaufort Sea | 37 | 0.61 | 4 | 0 |
| Beaufort Sea | 37 | 0.61 | 5 | 0 |
| Beaufort Sea | 37 | 0.61 | 6 | 0 |
| Beaufort Sea | 37 | 0.61 | 7 | 0.151 |
| Kitikmeot | 32 | 0.82 | 4 | 0.902 |
| Kitikmeot | 32 | 0.82 | 5 | 0.935 |
| Kitikmeot | 32 | 0.82 | 6 | 0.938 |
| Kitikmeot | 32 | 0.82 | 7 | 0.91 |
| Laptev Sea | 167 | 0.71 | 4 | 0.441 |
| Laptev Sea | 167 | 0.71 | 5 | 0.589 |
| Laptev Sea | 167 | 0.71 | 6 | 0.694 |
| Laptev Sea | 167 | 0.71 | 7 | 0.758 |

**a**N: number of observations used in validation; *P*: value of parameter *P* used in the bioenergetic model; L_ini: larval size at hatch; EF: modeling efficiency, after Mayer and Butler (1993).

**Text S2. Sensitivity of growth to model parameters**

Modeled growth was more sensitive to one group of parameters involved in food consumption, when these were individually varied with ± 20% of their nominal values (Table S2; Figure S15). The allometric exponent (*bc*) of *Cmax* resulted in the largest proportional change in length (ΔL) of 0.17 after 30 days of growth, followed by the allometric factor (*ac*) of *Cmax*, *A*, *CDn*, *npl*, *Lyex,* and *P* with a proportional ΔL from the reference length between 0.05 and 0.10 (Table S2). The parameters *CDf* and *Qox* induced a negative response in ΔL of 0.07 and 0.02, respectively. The less sensitive group of parameters comprised those describing respiration and metabolic losses, namely *av*, *bv*, *SDA*, *Qox*, and the caloric density of copepods eggs *CDe*, resulting in negative ΔL < 0.02 of the reference length (Figure S15).

**Table S2.** **Variation in model parameters and contribution to prediction error (R2) shown by two larval sizes**

| **Parameter (unit)** | **Mean value (min–max)** | **R2** | | **IPP, 20% increase** |
| --- | --- | --- | --- | --- |
| **6 mm** | **12 mm** | **ΔLa** |
| Proportion food consumption | 0.73 (0.58–0.88) | < 0.01 | 0.12 | 0.06 |
| Assimilation efficiency | 0.8 (0.64–0.96) | 0.10 | 0.12 | 0.10 |
| *Cmax* allometric factor | 0.0337 (0.0269–0.0404) | 0.09 | 0.12 | 0.10 |
| *Cmax* allometric exponent | –0.2862 (–0.2289 to –0.3434) | 0.49 | 0.28 | 0.17 |
| Calorific density of Arctic cod (cal g–1) | 1327 (1062–1593) | 0.14 | 0.12 | –0.07 |
| Calorific density of nauplii (cal g–1) | 1716 (1372–2059) | 0.16 | 0.22 | 0.08 |
| Calorific density of eggs (cal g–1) | 475 (380–570) | < 0.01 | < 0.01 | 0.00 |
| Fraction of nauplii in diet | 0.8 (0.64–0.96) | - | - | 0.06 |
| Length at yolk exhaustion (mm) | 8.5 (6.8–10.2) | < 0.01 | < 0.01 | 0.05 |
| Oxycalorific coefficient (cal g O2–1) | 3234 (2588–3881) | < 0.01 | < 0.01 | –0.02 |
| VO2 allometric factor | 0.0355 (0.0284–0.0426) | < 0.01 | < 0.01 | –0.02 |
| VO2 allometric exponent | –0.1699 (–0.1359 to –0.2039) | < 0.01 | < 0.01 | –0.02 |
| Specific dynamic action | 0.375 (0.30–0.45) | < 0.01 | < 0.01 | < 0.01 |
| Sum R2 | - | 0.96 | 0.97 | - |

a ΔL: the proportional change in length from the reference Lref after 30 days of growth, results from individual parameter perturbation analysis (IPP).

**Figure S15. Sensitivity analysis by individual parameter perturbation (IPP).**

(A) Length-at-age from different model outputs of the IPP analysis, in which parameters values were increased by 20% their nominal values. Larval growth was initialised with a size at hatch of 6 mm and used a temperature of –1ºC. The sensitive parameters that induce a large effect on larval length are shown in solid lines, while the small effects are in dashed lines. Ref represents larval length over a 30-day period of growth using the nominal values of all parameters. (B) The ratio of change in larval length from the reference length (Ref) after 30 days of growth, when each individual parameter was varied ± 20% at the time. The parameters are ordered from higher to lower sensitivity (left to right).

**Text S3.** **Sensitivity of growth to the combined effect of all model parameters**

When a global sensitivity analysis was applied, to test the combined effect of the parameters, the same group of parameters sensitive to the IPP induced the largest changes in model output, each contributing between 0.09 to 0.49 of the response variance (Table S2, Figures S16 and S17). A marked difference was observed in the growth of small yolk-sac larvae (6 mm SL) vs larger larvae (12 mm SL). Growth of small yolk-sac larvae was disproportionally more sensitive to *bc* that contributed with 0.49 of response variance (Figure S18A). In the growth of the large larvae (12 mm SL), *bc* contribution to the response variance decreased to 0.28, followed by the *CDn* with 0.22. The rest of sensitive parameters shared an equal contribution of 0.12 to the response variance (Figure S18B).

When both temperature and food consumption (through the value of *P*) were varied, with values randomly drawn from a normal distribution, growth in the BEM showed similar trend across the temperature range as when the *P* was fixed (Figure S18A, Loess regression line). Nevertheless, *P* had a significantly positive effect on modeled growth in all three models.

**Figure S16.** **Pearson correlation between modeled larval length and model parameters**. Larval length was estimated for a small yolk-sac larva with SL = 6 mm. Model parameters used variation in values drawn from a normal distribution by Latin Hypercube Sampling (shown in Table S2).

**Figure S17.** **Pearson correlation between modeled larval length and model parameters**. Larval length was estimated for a larva with SL = 12 mm. Model parameters used variation in values drawn from a normal distribution by Latin Hypercube Sampling (shown in Table S2).

**Figure S18. Parameters ranking from a global sensitivity analysis.**Percentage of variance (% of R2) in a multiple regression model on larval length explained by variation in model parameters with 95% confidence intervals. Model parameters, using variation in values drawn from a normal distribution by Latin Hypercube Sampling, were used as explanatory variables in the regression model and larval length, simulated with BEM, was used as response variable. Results were normalized to sum 100%. Two models were tested: (A) for a small yolk-sac larva with L = 6 mm (R2 = 96.28%), and (B) for a post-yolk sac larva with L = 12 mm (R2 = 97.44%).
